# Supplementary material
Source: MDPI journal article supplement (https://www.mdpi.com/2304-6767/9/9/101)
Supplement: s1 [file s1]

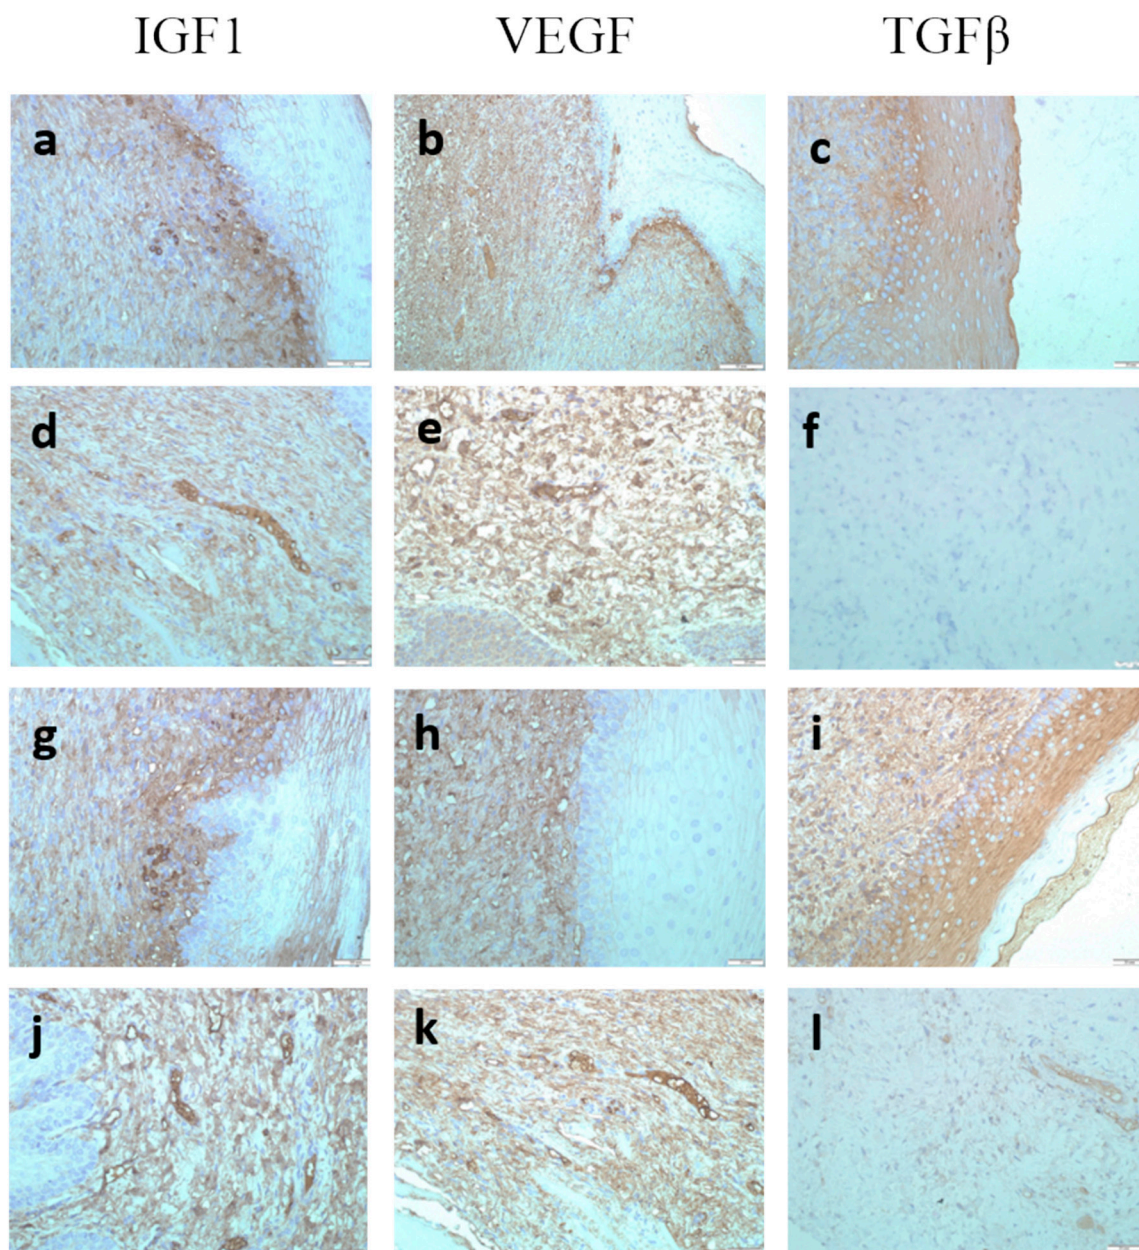

**Figure S1.** Immunohistochemical characterization of rabbit's gingiva augmented with Mucograft and stained for IGF1, VEGF, and TGF $\beta$ , magn.  $\times 200$ . (a)–(c) surface augmentation without local injection of MSCs (SGW subgroup): low expression of IGF1, VEGF, and TGF $\beta$  was found in the integumentary squamous epithelium, vessels, and fibroblastic elements of the submucosa; (d)–(f) surface augmentation in combination with local injection of MSCs (SGI subgroup): the values of all studied markers tended to increase, the levels of IGF1, VEGF, TGF $\beta$  were higher compared to the SGW subgroup; (g)–(i) augmentation under the flap without local injection of MSCs (UGW subgroup): the levels of IGF1, VEGF, TGF $\beta$  did not differ from those observed in the SGW subgroup; (j)–(l) augmentation under the flap with local injection of MSCs (UGI subgroup): increased expression of IGF1 and VEGF in the cells of the vascular wall, with a constant level of expression in the integumentary epithelium in comparison with UGW subgroup. On the contrary, the content of TGF $\beta$  increases in the epithelium, which may be associated with the phenomena of hyperkeratosis, with a simultaneous decrease in the vessels and fibroblastic elements.

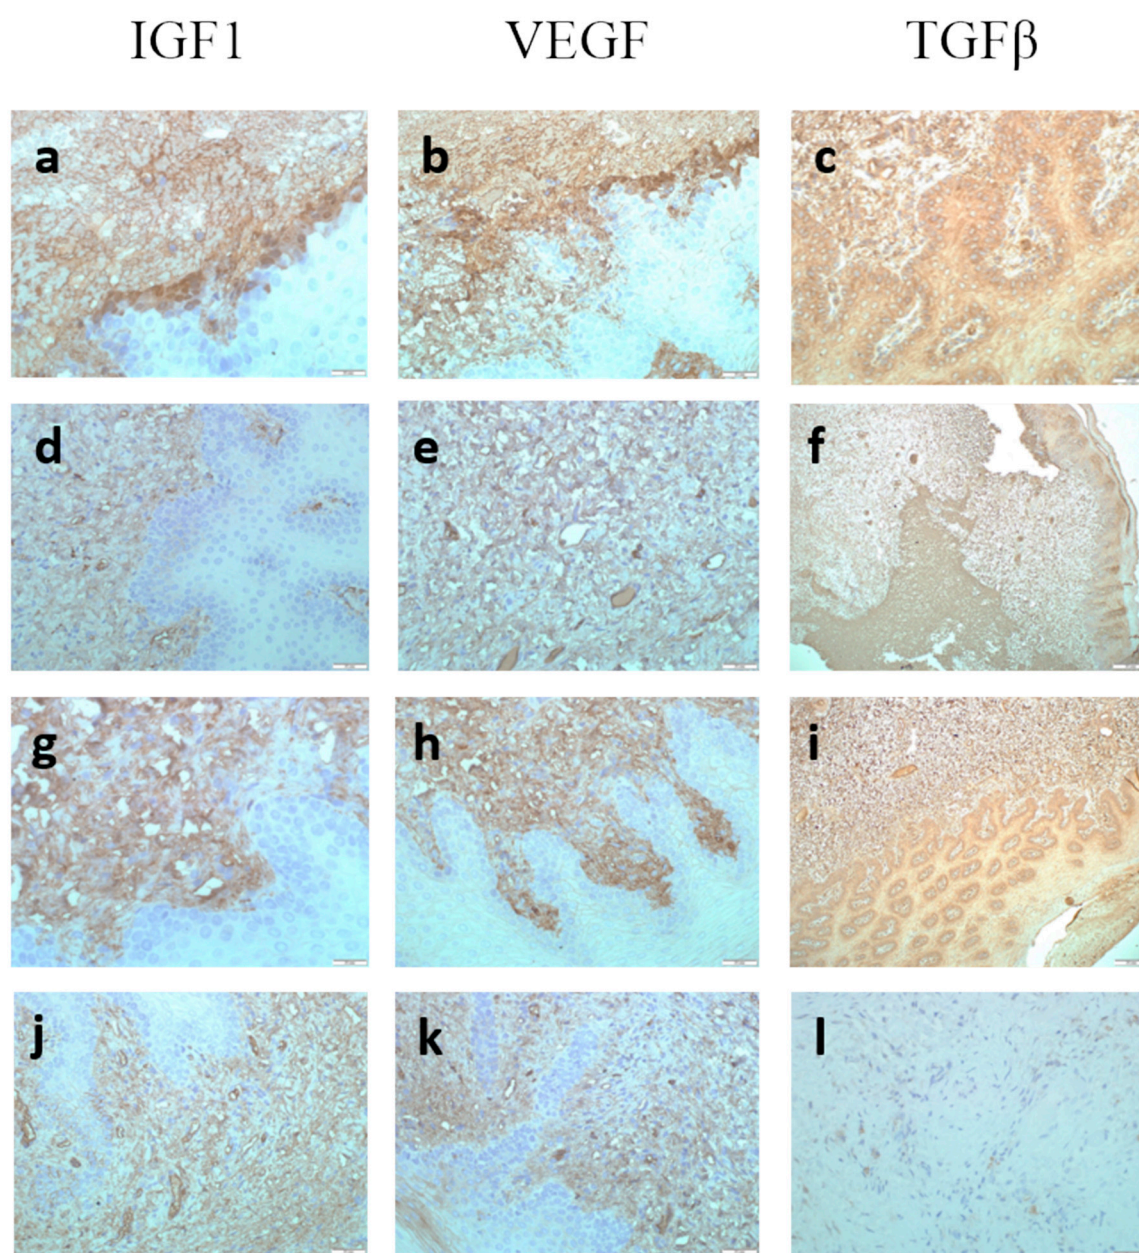

**Figure S2.** Immunohistochemical characterization of rabbit's gingiva augmented with Mucoderm and stained for IGF1, VEGF, and TGF $\beta$ , magn.  $\times 200$ . (a)–(c) surface augmentation without the local injection of MSCs (SDW subgroup): a low expression of IGF1 in the epithelium, moderate in the vessels and fibroblastic elements of the submucosal layer, VEGF and TGF $\beta$  - low expression in the epithelium and moderate in the cells of the vascular wall and fibroblastic elements; (d)–(f) surface augmentation in combination with local injection of MSCs (SDI subgroup): the values of all studied parameters tended to increase: IGF1 content was higher in vascular cells and fibroblastic elements, VEGF and TGF $\beta$  were higher only in epithelial cells compared to the SDW subgroup. TGF $\beta$  was found in small amounts in the cells of the vascular wall and fibroblastic elements; (g)–(i) augmentation under the flap without the local injection of cells (UDW subgroup): IGF1, VEGF, TGF $\beta$  levels did not differ from those observed in the SDW subgroup; (j)–(l) augmentation under the flap with MSCs injection (UDI subgroup): increased expression of IGF1 and VEGF in the cells of the vascular wall and fibroblastic elements, with a constant level of expression in the integumentary epithelium. In addition, the expression of VEGF and TGF $\beta$  is increased in the epithelium, which may be associated with increased angiogenesis and hyperkeratosis.
